# Supplementary material for: Development of a Membrane Module Prototype for Oxygen Separation in Industrial Applications
Source: MDPI journal article supplement (doi:10.3390/membranes12020167), 2022-01-30
Supplement: s1 [file s1]

## Article

# Development of a membrane module prototype for oxygen separation in industrial applications

Francesca Drago<sup>1,\*</sup>, Paolo Fedeli<sup>1</sup>, Angelo Cavaliere<sup>1</sup>, Andrea Cammi<sup>1</sup>, Stefano Passoni<sup>2</sup>, Riccardo Mereu<sup>2</sup>, Stefano De La Pierre<sup>3</sup>, Federico Smeacetto<sup>3</sup> and Monica Ferraris<sup>3</sup>

<sup>1</sup> Materials and Generation Technologies Department (TGM), Ricerca sul Sistema Energetico S.p.A. - RSE, 20134 Milan, Italy; francesca.drago@rse-web.it (F.D.); paolo.fedeli@rse-web.it (P.F.); angelo.cavaliere@rse-web.it (A.Cav.); andrea.cammi@rse-web.it (A.Cam.)

<sup>2</sup> Energy Department, Politecnico di Milano, 20156 Milan, Italy; stefano.passoni@polimi.it (S.P.); riccardo.mereu@polimi.it (R.M.)

<sup>3</sup> Department of Applied Science and Technology (DISAT), Politecnico di Torino, 10129 Turin, Italy; stefano.delapierre@polito.it (S.D.); federico.smeacetto@polito.it (F.S.); monica.ferraris@polito.it (M.F.)

\* Correspondence: francesca.drago@rse-web.it

## Supplementary Material

**Citation:** Drago, F.; Fedeli, P.; Cavaliere, A.; Cammi, A.; Passoni, S.; Mereu, R.; De La Pierre, S.; Smeacetto, F.; Ferraris, M. Development of a membrane module prototype for oxygen separation in industrial applications. *Membranes* **2022**, *12*, 167. <https://doi.org/10.3390/10.3390/membranes12020167>

Academic Editor: Gianluca Di Profio

Received: 30 December 2021

Accepted: 24 January 2022

Published: 30 January 2022

**Publisher's Note:** MDPI stays neutral with regard to jurisdictional claims in published maps and institutional affiliations.

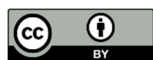

**Copyright:** © 2022 by the authors. Submitted for possible open access publication under the terms and conditions of the Creative Commons Attribution (CC BY) license (<https://creativecommons.org/licenses/by/4.0/>).

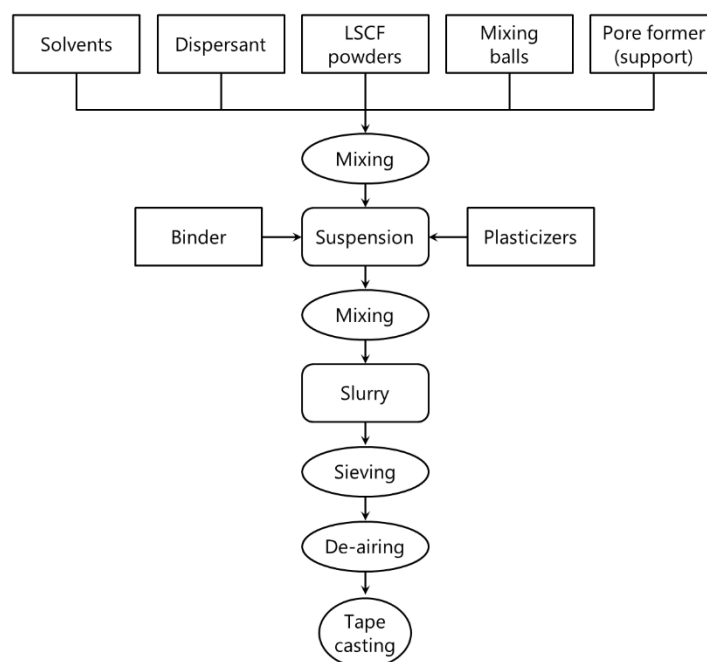

**Figure S1.** Scheme of the procedure followed for the slurry preparation.

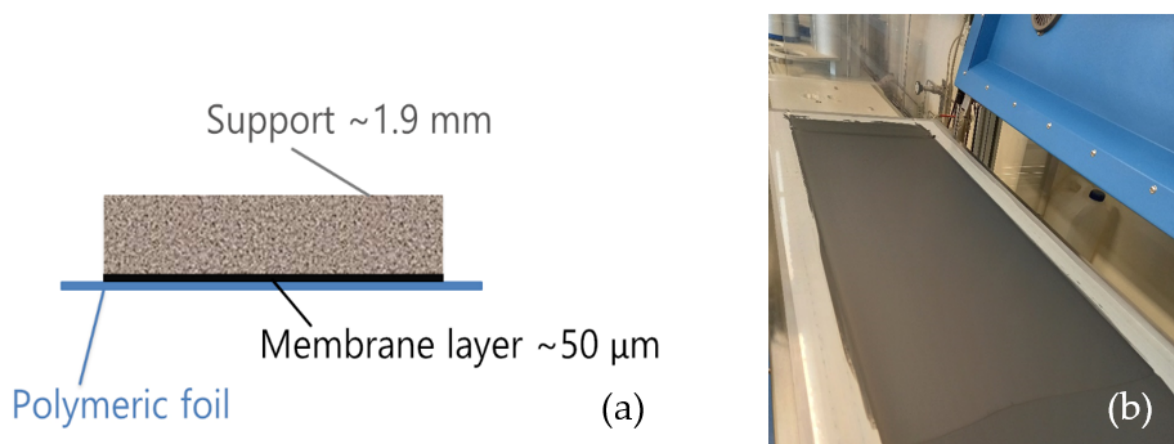

**Figure S2.** (a) Schematization and (b) picture of an asymmetric green tape, composed by a thin dense membrane underlying a thick porous support. In (a) the doctor blade gaps for casting the different layers are indicated.

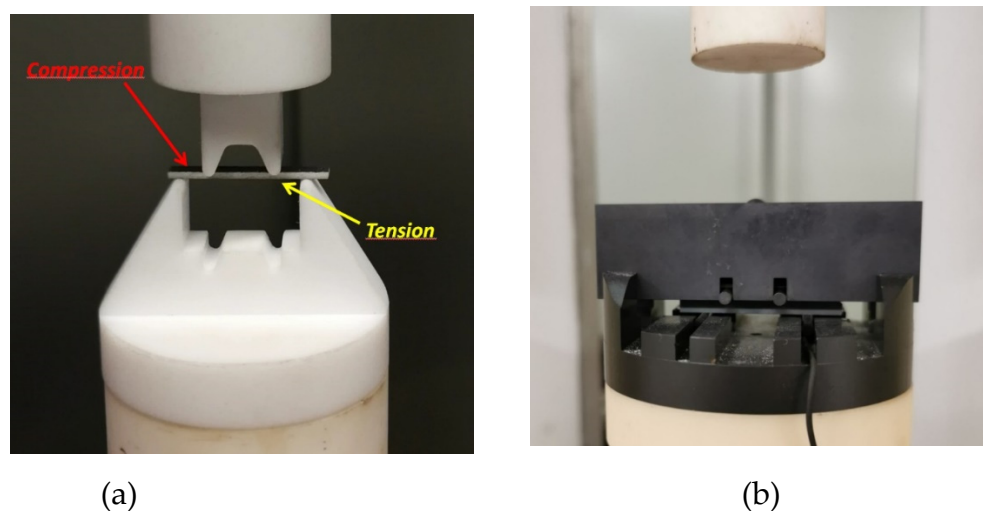

**Figure S3.** Test setup for the four-point bending tests at (a) room temperature and (b) 950 °C.

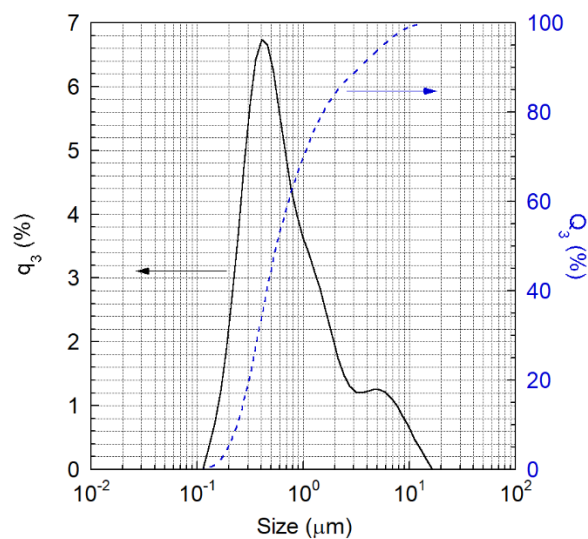

**Figure S4:** PSD (solid line) and cumulative PSD (dashed line) of the LSCF powder.

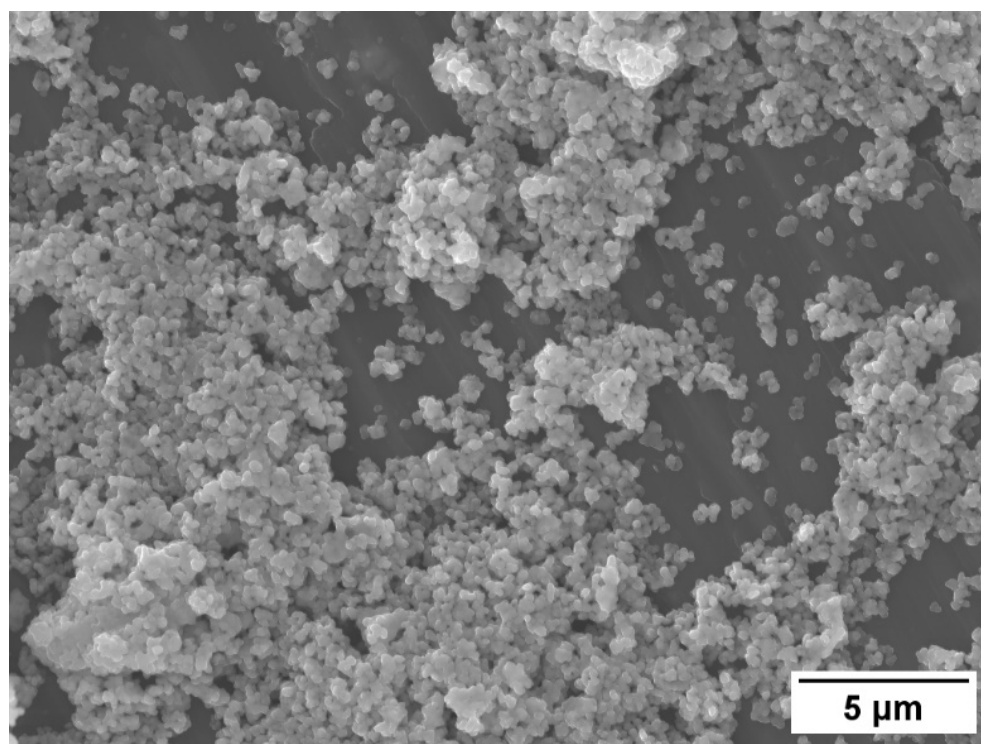

**Figure S5.** SEM image of the commercially available LSCF powder used for the manufacturing of the membrane components.

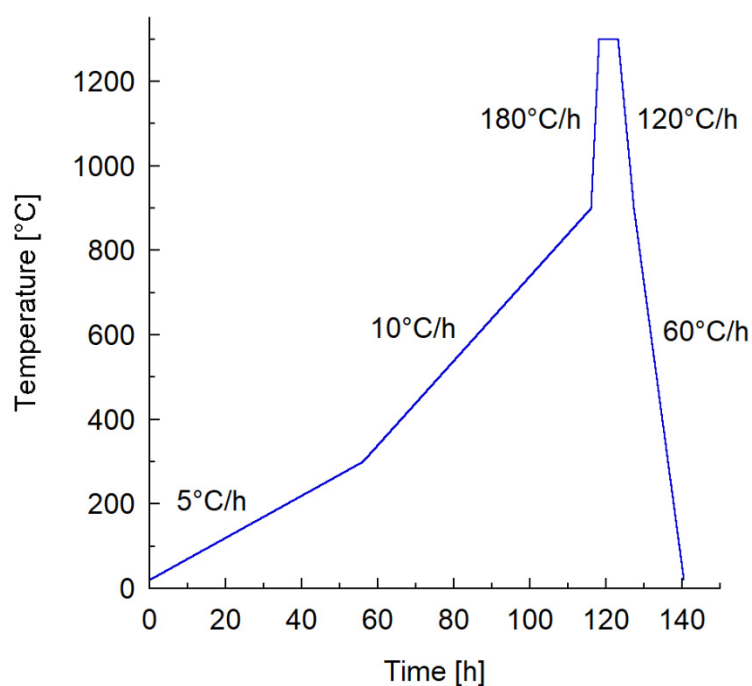

**Figure S6.** Debinding and sintering program of the membrane half-components.

### Oxygen flux estimation

In order to estimate the oxygen flux permeated through the membrane,  $J(o_2)_M$ , the total oxygen flux,  $J(o_2)_{TOT}$ , was depurated by the oxygen permeated through the defects,  $J(o_2)_D$ , according to the following equation:

$$\begin{aligned}
 J(O_2)_M &= J(O_2)_{TOT} - J(O_2)_D = F(He) * \frac{x(O_2)}{x(He)} - F(N_2)_D * \frac{0.21}{0.79} \\
 &= F(He) * \frac{x(O_2)}{x(He)} - F(He) * \frac{x(N_2)}{x(He)} * \frac{0.21}{0.79} = \frac{F(He)}{x(He)} \left( x(O_2) - x(N_2) * \frac{0.21}{0.79} \right)
 \end{aligned}$$

Where  $x(He)$ ,  $x(O_2)$  and  $x(N_2)$  are the helium, oxygen and nitrogen concentration, respectively, obtained by microGC measurements,  $F(N_2)_D$  is the estimated nitrogen flux which permeates through the defects,  $F(He)$  is the sweep gas flow rate, controlled by a mass flow controller, while  $\frac{0.21}{0.79}$  is the ratio between oxygen and nitrogen concentration in the feed gas stream.
